# Supplementary material for: Evaluation of School Vaccine Coverage and Medical Vaccine Exemptions Following the Repeal of School Entry Nonmedical Vaccine Exemption Options in New York State
Source: medRxiv preprint, doi:10.1101/2023.08.17.23294227, version 1 (2023-08-23)
Supplement: Supplemental Appendix [file 294227_file03.docx]

**Supplemental Appendix 1.** Final selected binomial generalized estimating equations (GEE) model with an identity link function and results estimating the impact of New York State (NYS) Senate Bill 2994A on required immunization completion.

| **Final selected model:** | | | | |
| --- | --- | --- | --- | --- |
|  | | | | |
| **Term** | **Estimate** | **P value** | **Lower CI** | **Upper CI** |
| Intercept | 0.9847 | <0.001 | 0.9837 | 0.9858 |
| Time | -0.0016 | <0.001 | -0.0018 | -0.0013 |
| Law | 0.0084 | <0.001 | 0.0067 | 0.0101 |
| Time post law | 0.0027 | <0.001 | 0.0018 | 0.0037 |
| School type | -0.0987 | <0.001 | -0.0840 | -0.1135 |
| TimeSchool type | -0.0021 | 0.0245 | -0.0003 | -0.0040 |
| LawSchool type | 0.0380 | <0.001 | 0.0282 | 0.0477 |
| Time post lawSchool type | 0.0097 | <0.001 | 0.0048 | 0.0146 |
| **Where:**   - *Complete vxij =* Mean school required vaccine completion (%) - *Timeij* = Time from the start of study period (years) - *Lawij =* NYS Senate Bill 2994A implementation (0=pre-implementation; 1=post-implementation) - *Time post lawij* = Time from Senate Bill 2994A implementation (school years) - *School typeij* = Represents public or nonpublic school (0=public or 1=nonpublic) - = Error term - *i* = Individual school - *j* = Time | | | | |

**Supplemental Appendix 2.** Final selected binomial generalized estimating equations (GEE) model with an identity link function and results estimating the impact of New York State (NYS) Senate Bill 2994A on medical exemption uptake.

|  | | | | |
| --- | --- | --- | --- | --- |
|  | | | | |
| **Term** | **Estimate** | **P value** | **Lower CI** | **Upper CI** |
| Intercept | 0.0018 | <0.001 | 0.0016 | 0.0020 |
| Time | 0.0001 | 0.0296 | 0.0000 | 0.0001 |
| Law | -0.0006 | 0.0053 | -0.0002 | -0.0010 |
| Time post law | -0.0002 | <0.001 | -0.0001 | -0.0003 |
| School type | 0.0020 | <0.001. | 0.0011 | 0.0029 |
| **Where:**   - *Medical exemption uptakeij* = Mean school medical exemption uptake (%) - *Timeij* = Time from the start of study period (years) - *Lawij =* NYS Senate Bill 2994A implementation (0=pre-implementation; 1=post-implementation) - *Time post lawij* = Time from Senate Bill 2994A implementation (years) - *School typeij* = Represents public or nonpublic school (0=public or 1=nonpublic) - = Error term - *i* = Individual school - *j* = Time | | | | |

**Supplemental Appendix 3.** Final selected binomial generalized estimating equations (GEE) model with an identity link function and results estimating the impact of New York State (NYS) Senate Bill 2994A on the uptake of all vaccine exemptions.

|  | | | | |
| --- | --- | --- | --- | --- |
|  | | | | |
| **Term** | **Estimate** | **P value** | **Lower CI** | **Upper CI** |
| Intercept | 0.0067 | <0.001 | 0.0063 | 0.0070 |
| Time | 0.0007 | <0.001 | 0.0006 | 0.0008 |
| Law | -0.0098 | <0.001 | -0.0093 | -0.0103 |
| Time post law | -0.0008 | <0.001 | -0.0007 | -0.0009 |
| School type | 0.0525 | <0.001 | 0.0407 | 0.0644 |
| TimeSchool type | 0.0028 | <0.001 | 0.0018 | -0.0039 |
| LawSchool type | -0.0712 | <0.001 | -0.0582 | -0.0839 |
| Timepost lawSchool type | --0.0024 | <0.001 | -0.0012 | -0.0036 |
| **Where:**   - *Overall exemption uptakeij =* Mean school medical and religious exemption uptake (%) - *Timeij* = Time from the start of study period (years) - *Lawij =* Represents period before and after Senate Bill 2994A implementation (0 or 1) - *Time post lawij* = Time from Senate Bill 2994A implementation (years) - *School typeij* = Represents public or nonpublic school (0 or 1) - = Error term - *i* = Individual school - *j* = Time | | | | |
